# Supplementary material for: Toward synthetic models for high oxidation state forms of the Photosystem II active site metal cluster: the first tetranuclear manganese cluster containing a [Mn4(µ-O)5]6+ coreElectronic supplementary information (ESI) available: Full ORTEP of cation, ESI mass spectrum and 1H NMR spectrum. 3D Picture of the crystal structure. See http://www.rsc.org/suppdata/cc/b1/b111554e/
Source: Royal Society of Chemistry journal article supplement (doi:10.1039/b111554e), 2002-03-21

Supplementary Material (ESI) for Chemical Communications

This journal is © The Royal Society of Chemistry 2002


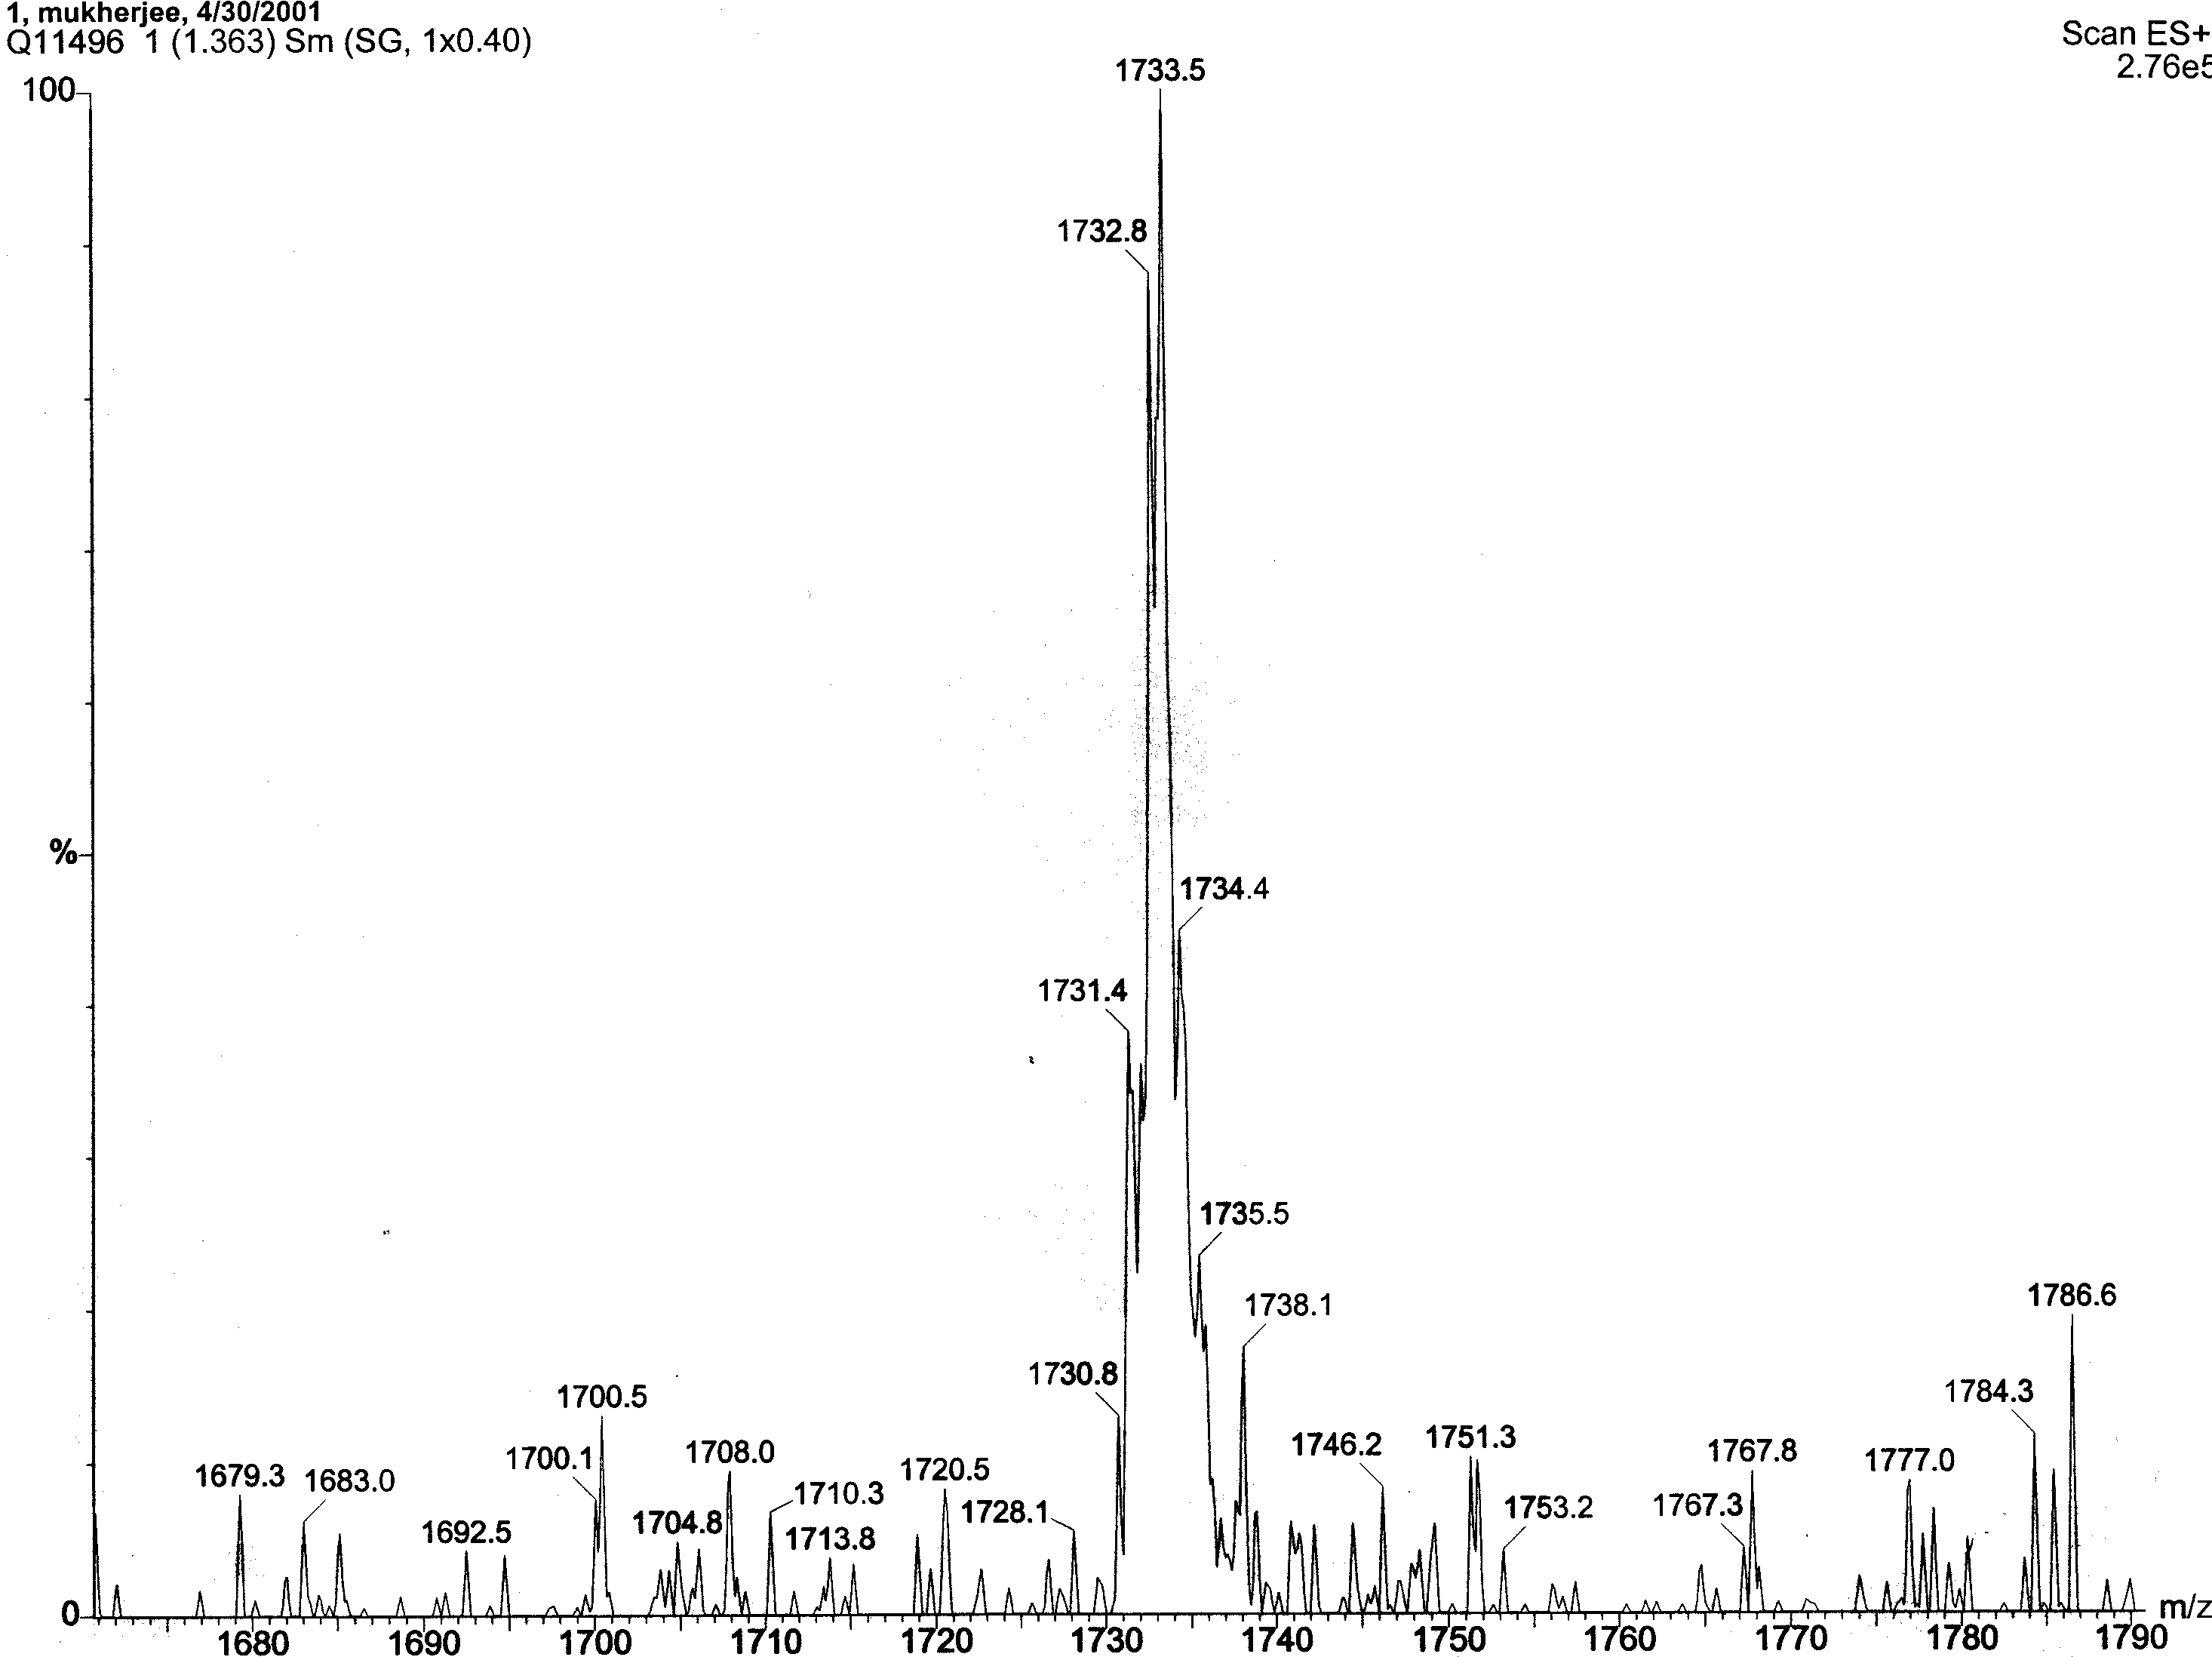

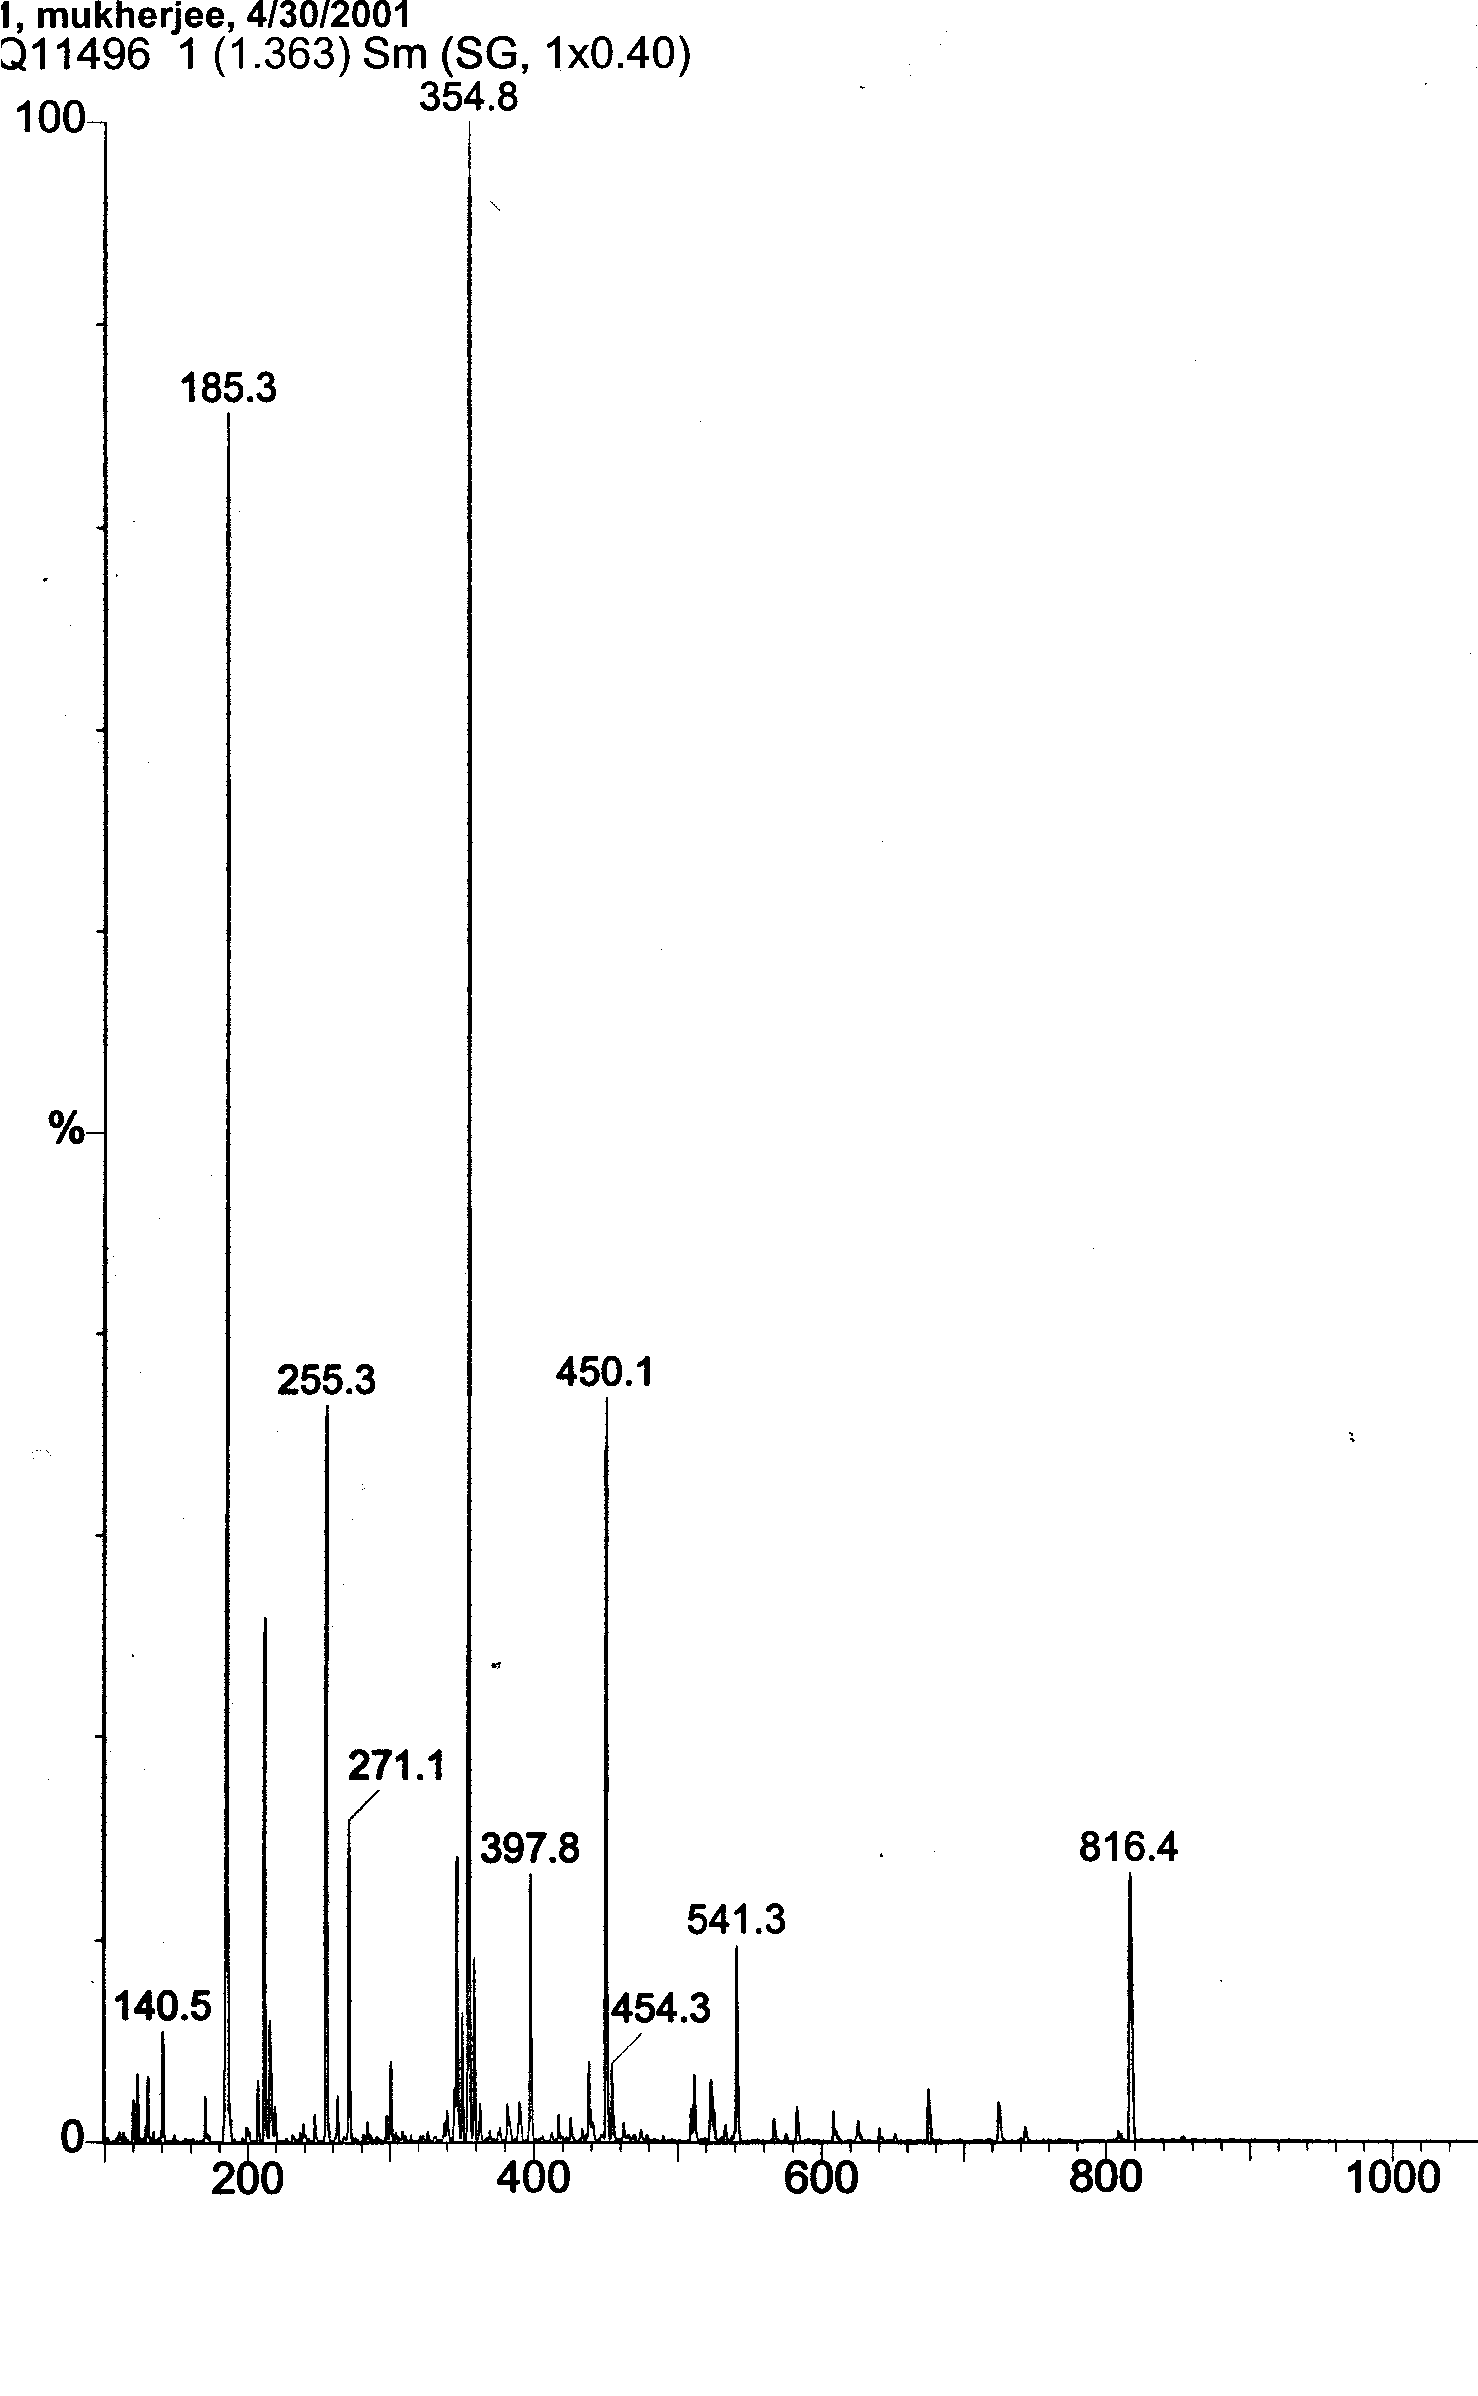

Supplement: b111554e2.doc [file b111554e2.doc]
